# Supplementary material
Source: Research Square preprint supplement (doi:10.21203/rs.3.rs-9486840/v1)
Supplement: Supplementary file 1 [file a8ace0a2847ae53a05c0a1a3.docx]

- **Appendix 1**
- **Terms of reference for the paediatric palliative care research advisory group**
- **Our group**: This is a closed group with 20 members to serve in the capacity of advisory child experts throughout the project life cycle (four years- starting in December 2023, ending December 2027). Membership of the group is restricted to young people living with a life-limiting and life-threatening condition, aged 10-19 years, aware of their diagnosis, receiving care from any of the three study sites of Mildmay Uganda, Mulago National Referral and Teaching hospital and Kawempe Home Care. Members must undergo an initial training and orientation on their role. Assent and consent from guardians/parents is required for all young people below the age of 18 years, (unless they are emancipated minors. These criteria are in line with Uganda’s laws on consenting and assenting. In all instances the group meetings and discussions will be facilitated by members of the study team in partnership with the young people.
- **Purpose:** The purpose of the group is to advise the study team on how best to engage children and young people in research and to actively participate in study meetings, workshops, and dissemination events in an advisory role. Other group activities will include trainings, shared learning, and engagement in advocacy. The study team receive ethical approval to keep this group as part of the community engagement plan and that it can be dissolved after the study, in 2027.
- **Governance**: In terms of governance, the group members democratically elected three people as office bearers: the chairperson, vice chairperson and a secretary. For group members to vote for their office bearers, the workshop facilitators briefed them about the roles and qualities required for each leadership portfolio.
- **How we shall operate**: The group will hold quarterly meetings at Mulago Hospital guest house. The quarterly schedule was proposed because some of the members are students. The agreed upon mode of communication was via phone calls or WhatsApps and in this way the leaders would receive a contribution towards data costs. The communication can also be sent through parents/guardians by word of mouth. Given that parental support is important, parents/ and guardians will also be invited to attend these meetings, and they will sit together in groups for group shared learning sessions as the young people deliberate on study project matters. The young people will always receive a transport refund and some honorarium for their role. Where necessary, these details will be relayed to their parents or guardians (this may not be necessary for emancipated minors and those above the age of 18 years). The young people proposed that food and drinks should be served at such meetings and the needs of those with special dietary requirements should be catered for.
- **How to maintain membership:** Group membership will be maintained by attending at least one meeting a year. Attendance can be physical, virtual, or a member can send their contribution to a given agenda in written form or via an audio recording.
